# Supplementary material for: Genetic screen identified PRMT5 as a neuroprotection target against cerebral ischemia
Source: eLife. 2024 Feb 19;12:RP89754. doi: 10.7554/eLife.89754 (PMC10942588; doi:10.7554/eLife.89754)
Supplement: Supplementary file 4. [file elife-89754-supp4.xlsx]

## Sheet: Antibody
Antibody Name	Host	Supplier	Catalog
GAPDH	Rabbit	Cell signaling technology	2118
PRMT5	Rabbit	MilliporeSigma	07-405
NeuN	Mouse	MilliporeSigma	MAB377
HA-Tag	Rabbit	Cell signaling technology	3724
Goat anti-Mouse IgG DyLight 488	Goat	Invitrogen	35502
Goat anti-Rabbit IgG Dylight 549	Goat	Invitrogen	35560
Anti-Rabbit IgG, HRP-linked Antibody	Goat	Cell Signaling Technology	7074
Biotinylated anti-Rabbit IgG	Horse	Vector Lab	BP-9100
VECTASTAIN® ABC-HRP Kit, Peroxidase	Goat	Vector Lab	pk-6100
