# Supplementary figures and images for: Genetic screen identified PRMT5 as a neuroprotection target against cerebral ischemia
Source: eLife journal article supplement (doi:10.7554/elife.89754), 2023-11-15

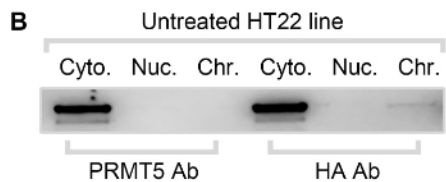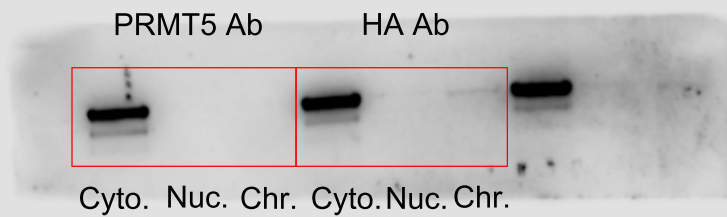

Supplement: fig2-data1 [file elife-89754-fig2-data1-v1.zip]

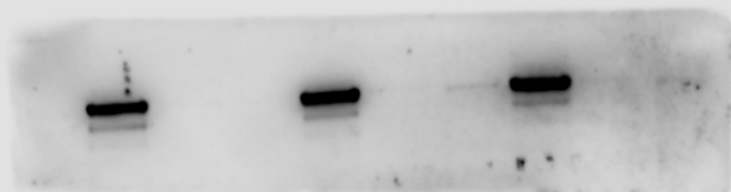

Supplement: fig2-data1 [file elife-89754-fig2-data1-v1.zip]

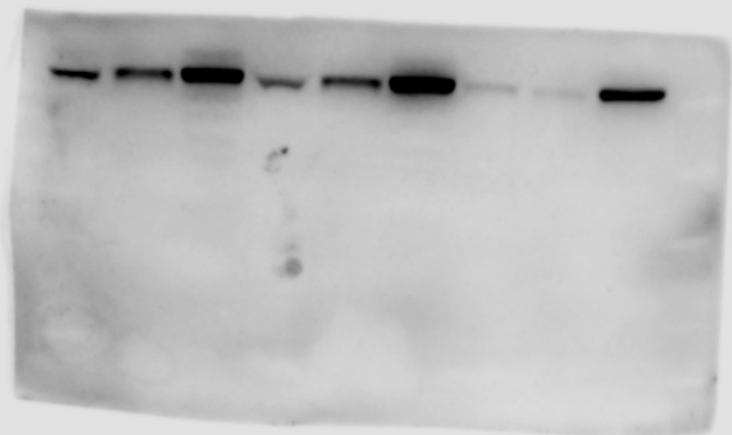

Supplement: fig2-data2 [file elife-89754-fig2-data2-v1.zip]

**B**

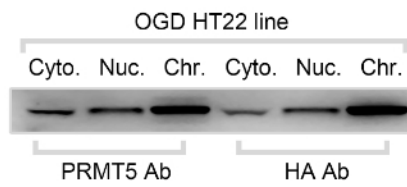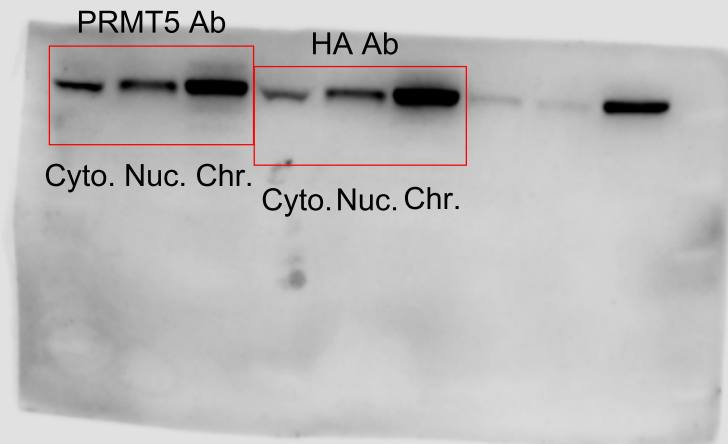

Supplement: fig2-data2 [file elife-89754-fig2-data2-v1.zip]

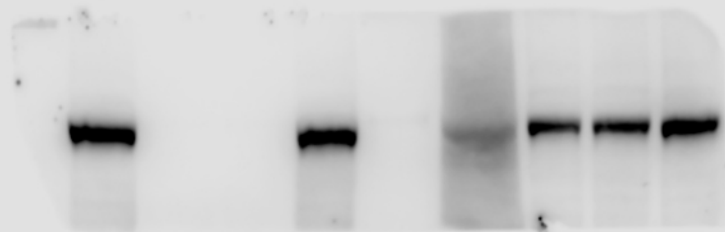

Supplement: fig2-data3 [file elife-89754-fig2-data3-v1.zip]

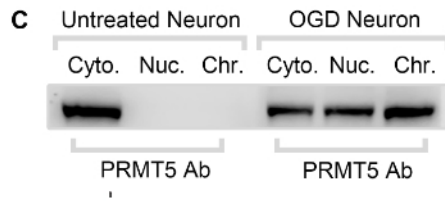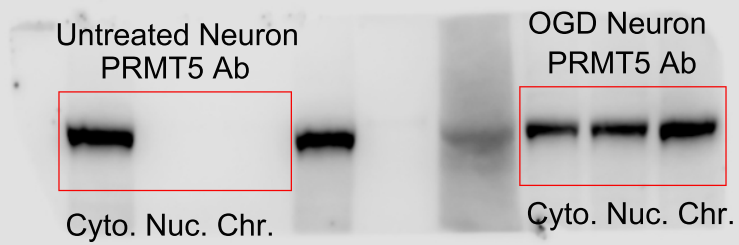

Supplement: fig2-data3 [file elife-89754-fig2-data3-v1.zip]

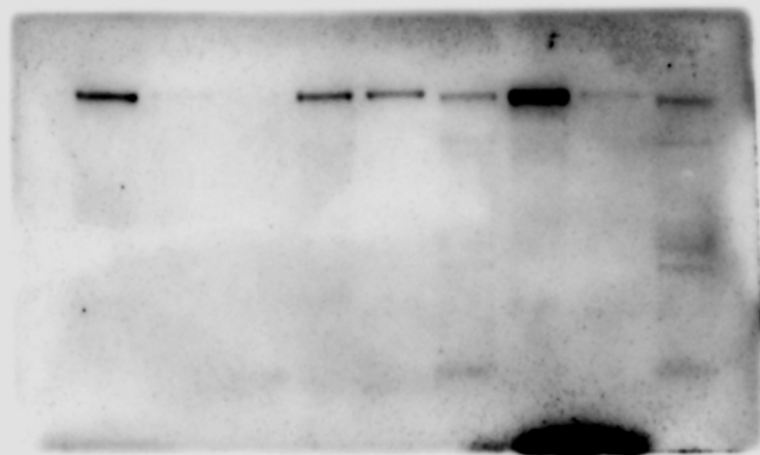

Supplement: fig3-data1 [file elife-89754-fig3-data1-v1.zip]

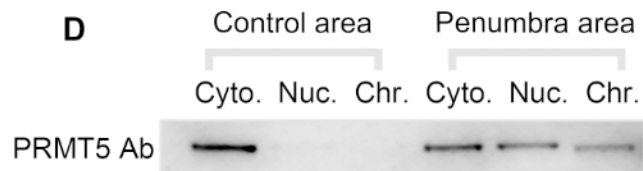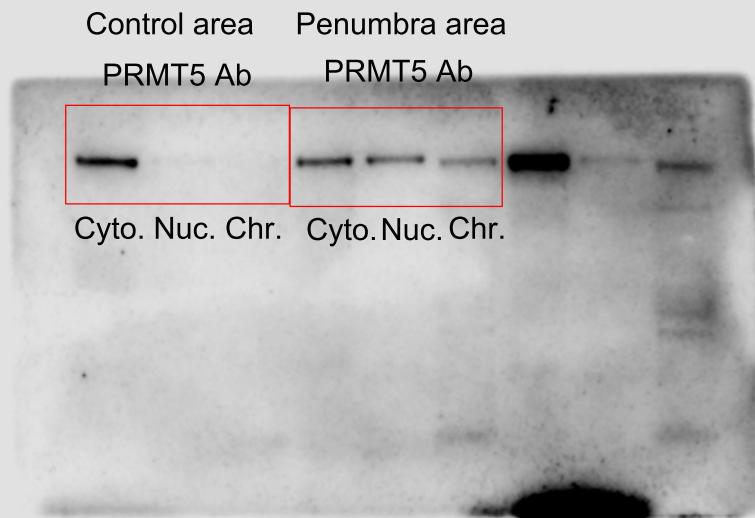

Supplement: fig3-data1 [file elife-89754-fig3-data1-v1.zip]
